# Supplementary material for: A Dynamic Evaluation Method for High-Permeability New Energy Distribution Network Planning Considering Multistage Development Trends
Source: Frontiers journal article supplement (doi:10.3389/fenrg.2022.958892), 2022-08-12
Supplement: Data_Sheet_1.pdf [file Data_Sheet_1.pdf]

## Appendix A

The set of all planning scenarios is defined as  $S = \{S_1, S_2, \dots, S_m\}$ . The evaluation index of each scheme is set as  $C = \{C_1, C_2, \dots, C_{11}\}$ . At the same time, the mean and standard deviation of the evaluation indicators of each scheme are set as  $M = \{\mu_1, \mu_2, \dots, \mu_{11}\}$  and  $\Sigma = \{\sigma_1, \sigma_2, \dots, \sigma_{11}\}$ . Using the three-sigma criterion to process the set  $S$ , the singularity-free scheme  $S^* = \{S_i \in S \mid \forall c_{i,j} \in [\mu_j - 3\sigma_j, \mu_j + 3\sigma_j]\}$ . The obtained set  $S^*$  is continuously checked by three-sigma to obtain a new  $S^*$ . Thereby eliminating the singular scheme until the set  $S^*$  no longer changes.

After obtaining the final  $S^*$ , the dual excitation control line is further determined.  $\Gamma, r_{\max}^a, r_{\min}^a, \bar{r}^a$  are defined as the set of global growth rates, the global maximum growth rate, the global minimum growth rate and the global average growth rate, respectively. The calculation formula is as follows:

$$\left\{ \begin{array}{l} \Gamma = \{r_i^a \mid r_i^a = \frac{\sum_{k=1}^{N-1} (y_{i,k+1} - y_{i,k}) / (t_{k+1} - t_k)}{(N-1)}, S_i \in S^*\} \\ r_{\max}^a = \max_i \{r_i^a\} \\ r_{\min}^a = \min_i \{r_i^a\} \\ \bar{r}^a = \bar{\Gamma} \end{array} \right. \quad (A1)$$

Where,  $y_{ik}, y_{i,k+1}$  represents the static evaluation value of the  $k$ -th and  $(k+1)$ -th stage, respectively. And  $t_k, t_{k+1}$  respectively represents the time of the  $k$ -th and  $(k+1)$ -th stage. It can be seen that the elements of the global growth rate set respectively represent the average level of changes in the static assessment values in the adjacent stages of each planning case.

Finally, the slope of the positive and negative excitation lines is calculated by setting the slope offset  $V^+, V^- \in (0,1]$ , and the formula is:

$$\left\{ \begin{array}{l} k^+ = \bar{r}^a + V^+ (r_{\max}^a - \bar{r}^a) \\ k^- = \bar{r}^a + V^- (r_{\min}^a - \bar{r}^a) \end{array} \right. \quad (A2)$$

## Appendix B

| Stage 1 |       |       |           |        |          |                   |         |            |         |        |                   |
|---------|-------|-------|-----------|--------|----------|-------------------|---------|------------|---------|--------|-------------------|
|         | $C_F$ | $C_D$ | $C_{N-1}$ | $C_P$  | $C_B$    | $C_{\text{save}}$ | $C_e$   | $C_{RS-3}$ | $C_T$   | $C_U$  | $C_{\text{loss}}$ |
| Case 1  | 0.9   | 0.1   | 0.941     | 0.3756 | 0.121231 | 626.215           | 506.605 | 0.9977     | 12.2884 | 0.9165 | 183.103           |
| Case 2  | 0.3   | 0.6   | 0.974     | 0.2588 | 0.311321 | 713.978           | 400.209 | 0.9974     | 15.1273 | 0.9343 | 77.6931           |
| Case 3  | 0.8   | 0.32  | 0.913     | 0.2436 | 0.223421 | 655.177           | 530.720 | 0.9976     | 9.94605 | 0.9129 | 77.675            |
| Case 4  | 0.7   | 0.43  | 0.962     | 0.2636 | 0.171234 | 695.955           | 640.508 | 0.9980     | 9.81811 | 0.9553 | 187.142           |
| Stage 2 |       |       |           |        |          |                   |         |            |         |        |                   |
|         | $C_F$ | $C_D$ | $C_{N-1}$ | $C_P$  | $C_B$    | $C_{\text{save}}$ | $C_e$   | $C_{RS-3}$ | $C_T$   | $C_U$  | $C_{\text{loss}}$ |
| Case 1  | 0.65  | 0.35  | 0.964     | 0.3623 | 0.362916 | 621.692           | 649.734 | 0.9971     | 14.1951 | 0.9632 | 201.807           |
| Case 2  | 0.8   | 0.36  | 0.900     | 0.3864 | 0.343659 | 633.821           | 421.816 | 0.9989     | 19.4292 | 0.9632 | 220.512           |
| Case 3  | 0.71  | 0.41  | 0.969     | 0.3348 | 0.225867 | 593.209           | 744.309 | 0.9976     | 5.97058 | 0.9721 | 107.147           |
| Case 4  | 0.6   | 0.4   | 0.975     | 0.4599 | 0.255586 | 826.61            | 586.129 | 0.9978     | 15.7778 | 0.9563 | 239.674           |
| Stage 3 |       |       |           |        |          |                   |         |            |         |        |                   |
|         | $C_F$ | $C_D$ | $C_{N-1}$ | $C_P$  | $C_B$    | $C_{\text{save}}$ | $C_e$   | $C_{RS-3}$ | $C_T$   | $C_U$  | $C_{\text{loss}}$ |

|                |       |       |           |        |          |            |         |            |         |        |            |
|----------------|-------|-------|-----------|--------|----------|------------|---------|------------|---------|--------|------------|
| Case 1         | 0.5   | 0.53  | 0.982     | 0.6196 | 0.225395 | 687.857    | 730.559 | 0.9987     | 11.1446 | 0.9563 | 159.326    |
| Case 2         | 0.76  | 0.35  | 0.902     | 0.5292 | 0.092225 | 765.925    | 641.832 | 0.9992     | 17.1896 | 0.9632 | 236.145    |
| Case 3         | 0.53  | 0.43  | 0.913     | 0.4183 | 0.178001 | 763.656    | 617.815 | 0.9977     | 14.4760 | 0.9721 | 173.639    |
| Case 4         | 0.35  | 0.65  | 0.950     | 0.4461 | 0.176177 | 792.193    | 600.414 | 0.9975     | 5.02864 | 0.9721 | 70.7356    |
| <b>Stage 4</b> |       |       |           |        |          |            |         |            |         |        |            |
|                | $C_F$ | $C_D$ | $C_{N-1}$ | $C_P$  | $C_B$    | $C_{save}$ | $C_e$   | $C_{RS-3}$ | $C_T$   | $C_U$  | $C_{loss}$ |
| Case 1         | 0.46  | 0.49  | 0.945     | 0.5042 | 0.257539 | 687.814    | 416.292 | 0.9987     | 8.86544 | 0.9563 | 99.9073    |
| Case 2         | 0.32  | 0.5   | 0.972     | 0.6493 | 0.380852 | 605.658    | 599.898 | 0.9994     | 7.99074 | 0.9784 | 129.072    |
| Case 3         | 0.31  | 0.61  | 0.971     | 0.7305 | 0.31448  | 824.498    | 721.043 | 0.9989     | 6.50781 | 0.9784 | 95.4318    |
| Case 4         | 0.25  | 0.62  | 0.936     | 0.6830 | 0.318107 | 668.785    | 697.763 | 0.9987     | 15.4810 | 0.9784 | 64.8041    |
